# Supplementary material
Source: PubMed Central journal article supplement (PMC2660949)
Supplement: rspb20081376s16.pdf [file rspb20081376s16.pdf]

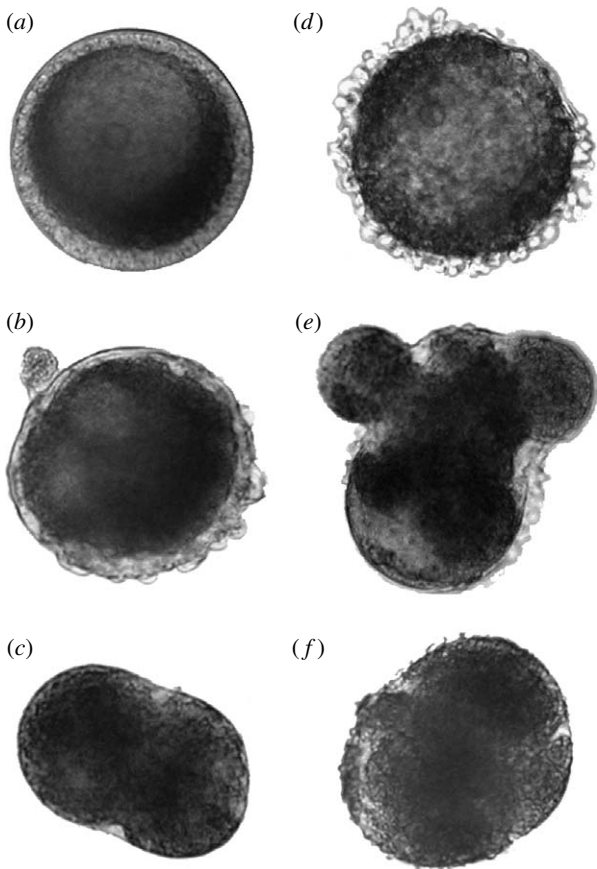

Figure S1. Examples of pressure effects on the morphology of *M. edulis* embryos incubated for 4 hours, with fertilization occurring at incubation pressure (light microscope images). (a) unfertilized egg (20°C, 300 atm); (b) fertilized egg showing abnormal development with an irregular cell membrane (20°C, 300 atm); (c) visible cleavage furrow of the two-cell stage (20°C, 400 atm); (d) unfertilized egg with cytoplasmic extrusions over the surface (10°C, 500 atm); (e) abnormally developing embryo (10°C, 500 atm); (f) abnormal cleavage furrow of the two-cell stage with cytoplasmic extrusions over the surface (10°C, 500 atm).
